# Supplementary material for: Adsorption of Malachite Green and Alizarin Red S Dyes Using Fe-BTC Metal Organic Framework as Adsorbent
Source: PubMed Central journal article supplement (PMC7830139; doi:10.3390/ijms22020788), 2021-01-14
Supplement: ijms-22-00788-s001.pdf [file ijms-22-00788-s001.pdf]

## Supporting information

# Adsorption of Malachite Green and Alizarin Red S dyes using Fe-BTC metal organic framework as adsorbent

Giulia Rossella Delpiano<sup>1</sup>, Davide Tocco<sup>1</sup>, Luca Medda<sup>2</sup>, Edmond Magner<sup>3\*</sup>, Andrea Salis<sup>1,4\*</sup>

<sup>1</sup> Dipartimento di Scienze Chimiche e Geologiche, Università di Cagliari, Cittadella Universitaria, S.S. 554 bivio Sestu, 09042 Monserrato (CA), Italy; delpiano@unica.it (G.R.D.); davide.tocco@unica.it (D.T.)

<sup>2</sup> Laboratorio NEST Scuola Normale Superiore di Pisa, 56127 Pisa, Italy; medda.luc@gmail.com

<sup>3</sup> Department of Chemical Sciences, Bernal Institute, University of Limerick, Limerick V94 T9PX, Ireland

<sup>4</sup> Consorzio Interuniversitario per lo Sviluppo dei Sistemi a Grande Interfase (CSGI), Unità Operativa University of Cagliari, Monserrato (CA) 09042, Italy

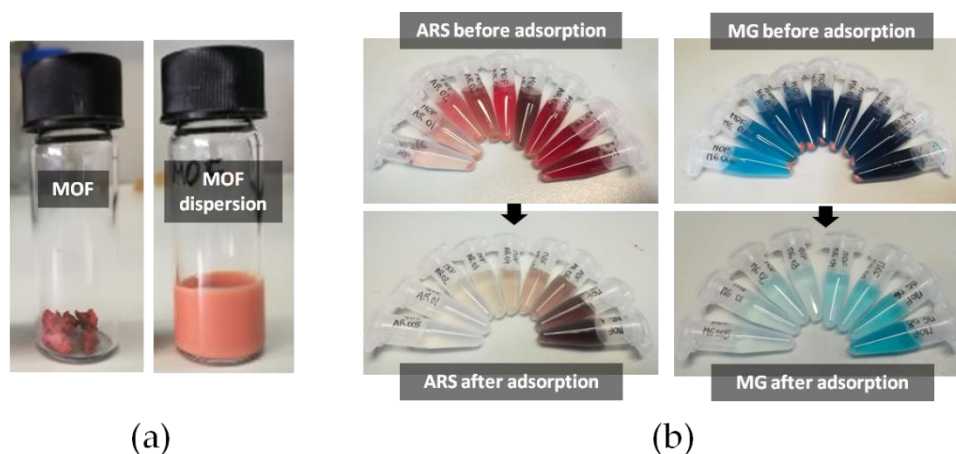

**Figure S1** - Images of a) the synthesized MOF before and after dispersion in distilled water; b) Solutions of ARS and MG prior to and after (20 h) adsorption .

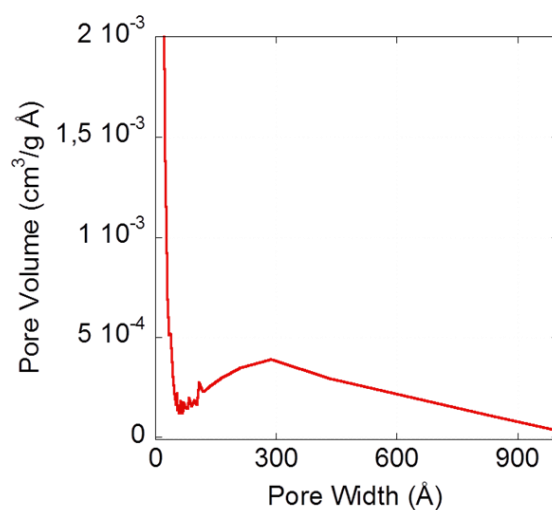

**Figure S2** – Pore size distribution (BJH method).

**Table S1.** Zeta potential of Fe-BTC dispersed in H<sub>2</sub>O and the percentage of dyes adsorbed at different pH values (initial concentration of dyes of 1.5 mM).

| pH | Fe-BTC Zeta potential (mV) | ARS adsorption% | MG adsorption% |
|----|----------------------------|-----------------|----------------|
| 3  | + 6                        | 59.1            | 89.3           |
| 4  | - 7                        | 49.2            | 98.5           |
| 5  | - 20                       | 31.3            | 94.7           |
| 6  | - 28                       | 34.1            | 93.1           |
| 7  | -16                        | 23.3            | 82.9           |

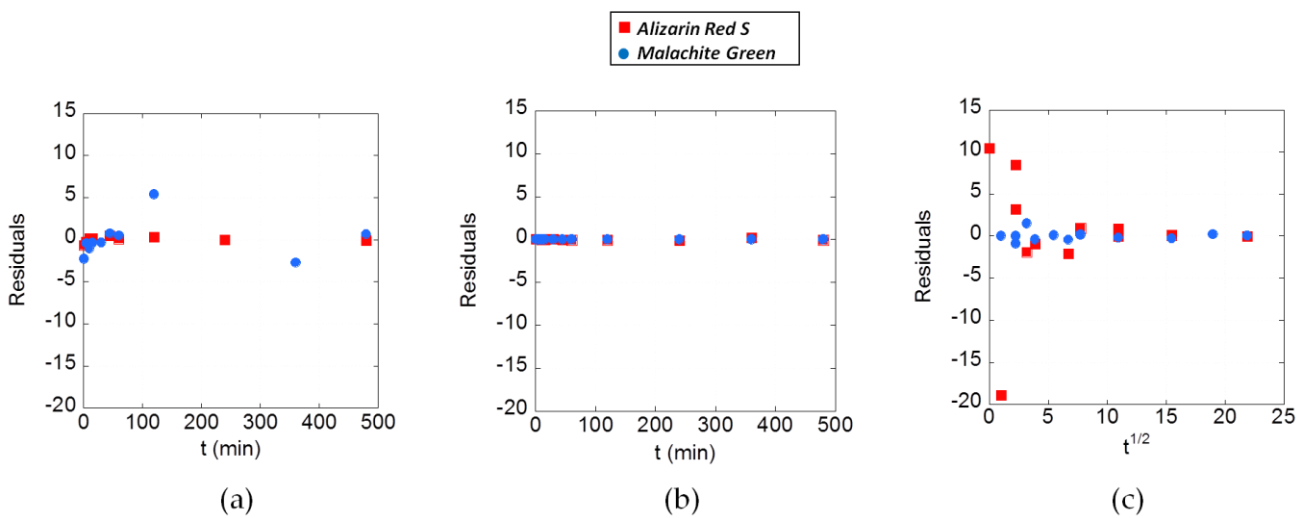

**Figure S3** – Residuals graph relative to a) Pseudo-First order, b) Pseudo-Second order and c) Intraparticle diffusion kinetic models.

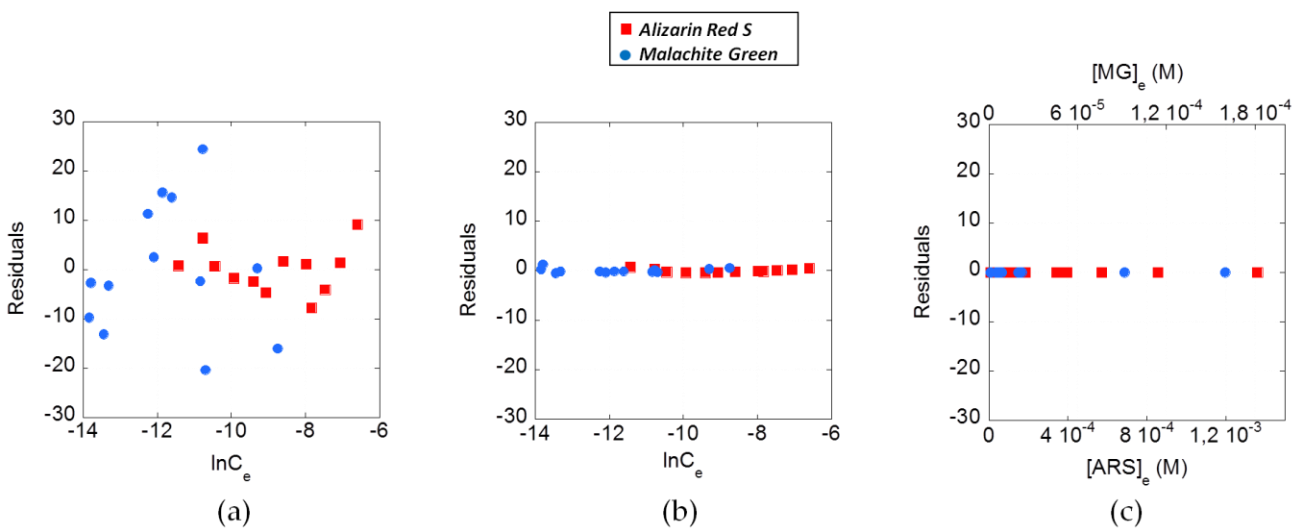

**Figure S4** – Residuals graph relative to a) Temkin, b) Freundlich and c) Langmuir isotherms models.
